# Supplementary material for: Enhanced absorbing properties of three-phase composites based on a thermoplastic-ceramic matrix (BaTiO3 + PVDF) and carbon black nanoparticles
Source: Royal Society of Chemistry journal article supplement (doi:10.1039/c4ta04493b), 2014-01-01
Supplement: c4ta04493b1.pdf [file c4ta04493b1.pdf]

## Supporting Information

### **Enhanced Absorbing Properties of Three-Phase Composites Based on Thermoplastic-Ceramic Matrix (BaTiO<sub>3</sub> +PVDF) and Carbon Black Nanoparticles**

**Xiao-Min Meng<sup>a §</sup>, Xiao-Juan Zhang<sup>b §</sup>, Chang Lu<sup>b</sup>, Ya-Fei Pan<sup>b</sup>, Guang-Sheng  
Wang<sup>b\*</sup>**

*<sup>a</sup>School of Chemical Engineering, Northeast Dianli University, Jilin 132000, PR*

*China*

*<sup>b</sup>Key Laboratory of Bio-Inspired Smart Interfacial Science and Technology of*

*Ministry of Education, School of Chemistry and Environment, Beihang*

*University, Beijing 100191, PR China*

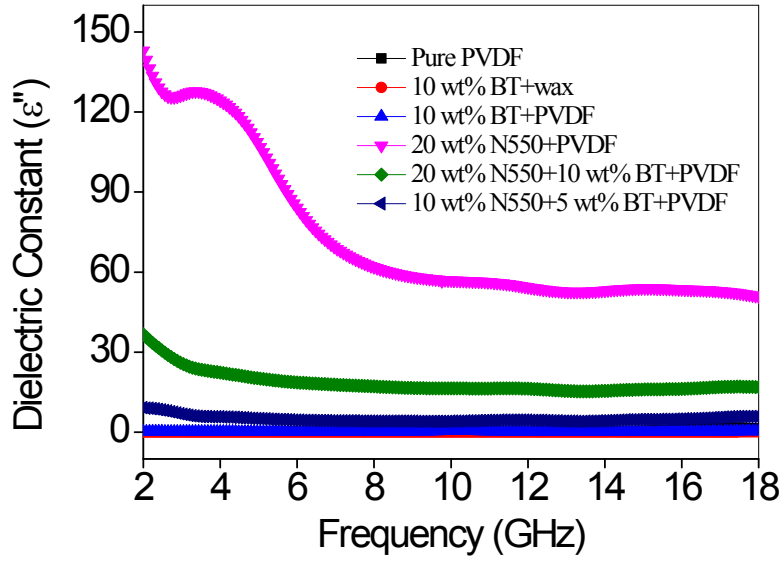

**Figure S1** Imaginary part of the Dielectric constant.

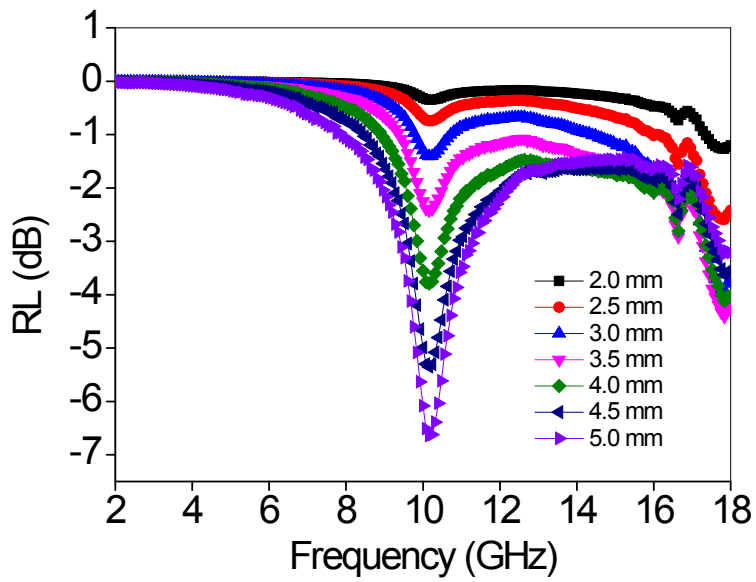

**Figure S2** the reflection loss of the BT/PVDF with the filler loading 10 wt. %

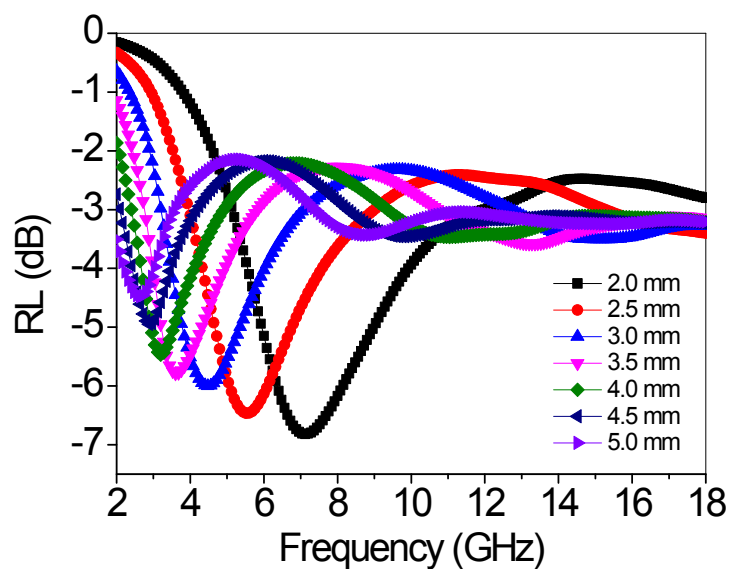

**Figure S3** The (CB+BT)/PVDF composites with filler CB 20wt %, BT 10wt.% in the frequency range of 2-18 GHz.

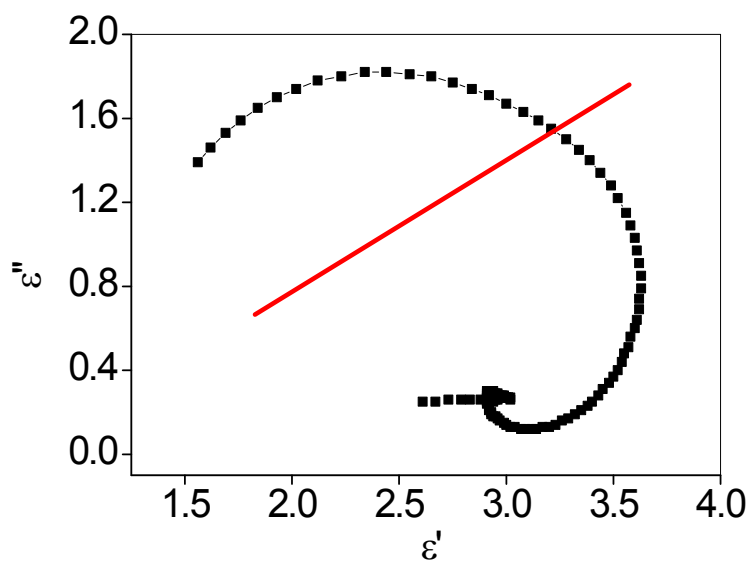

**Figure S4** the Cole-Cole semicircle of pure PVDF.
